# Supplementary material for: Efficient delivery of small RNAs to podocytes in vitro by direct exosome transfection
Source: Springer Nature journal article supplement (doi:10.1186/s12951-025-03426-7), 2025-05-23
Supplement: MOESM6 [file 12951_2025_3426_MOESM6_ESM.pdf]

## Supplementary Figure Captions

**Supplementary Figure 1: TEM images of exosomes prior and after transfection.** Isolated exosomes before and after transfection with Cy3-miRCtrl at 100000 X magnification. The exosomes show a typical cup-shape and size (20-30 nm). Scale bar = 100 nm.

**Supplementary Figure 2: Comparison of exosomal marker proteins in podocytes and isolated exosomes.** Three independent batches of podocytes and exosomes were precipitated with ExoQuick-TC and analyzed by Western blotting for the exosomal marker proteins TSG101 and CD9. CD9 was highly enriched in exosome samples whereas TSG101 is expressed in both sample types.

**Supplementary Figure 3: Flow cytometry and imaging flow cytometry.** (A) Normal flow cytometry reveals no differences in cell distribution in terms of size (FSC) and shape (SCC) between the different treatment groups. After treatment with Cy3-miRCtrlExos, 96.5% of all podocytes were positive for Cy3 (PE-A channel). Treated with Exos w/o Cy3-miRCtrl resulted in only 0.15% Cy3-positive podocytes (PE-A channel). Untreated podocytes were used as reference (PE-channel). (B) Imaging flow cytometry reveals Cy3-positive signals (blue line) only in podocytes treated with Cy3-miRCtrlExos. No Cy3-positive signals were found in the samples treated with exosomes without Cy3-miRCtrl (red line).

**Supplementary Figure 4: Dose- and time dependence of exosomal cargo internalization.** (A) Podocytes were treated with 18.75 µg, 37.5 µg, 75 µg and 150 µg Cy3-miRCtrlExos for 48 hours and stained for CD9. The exosomal cargo uptake is correlated with the exosome dosage. (B) Podocytes were treated with Cy3-miRCtrlExos for 4, 12, 24 and 48 hours followed by staining for CD9. The exosomal cargo uptake by podocytes can already be seen at 4 h and increases over time until 48 hours. F-Actin is stained with phalloidin. Nuclei are stained with DAPI. Scale bars = 20 µm.

**Supplementary Figure 5: Exosomes loaded with Pxn-siRNA downregulate Pxn expression in podocytes.** Podocytes were treated with siRNA CtrlExos or Pxn-siRNAExos for 48 hours. The Pxn fluorescence decreased in the Pxn-siRNA Exo-treated samples in almost every cell. F-Actin was stained with phalloidin. Scale bars = 20 µm.
